# Supplementary material for: Coupling epidemiological and tree growth models to control fungal diseases spread in fruit orchards
Source: PubMed Central journal article supplement (PMC6560096; doi:10.1038/s41598-019-44898-6), 2019-06-11
Supplement: 41598_2019_44898_MOESM1_ESM.pdf [file 41598_2019_44898_MOESM1_ESM.pdf]

Authors: Bevacqua D.<sup>1</sup>, Génard M.<sup>1</sup>, Lescourret F.<sup>1</sup>, Martinetti D.<sup>2</sup>, Vercambre G.<sup>1</sup>, Valsesia P.<sup>1</sup>,  
Mirás-Avalos J. M.<sup>1</sup>

1: UR 1115, Plantes et Systèmes de Culture Horticoles, Institut National de la Recherche Agronomique, Avignon, France. 2: UR 546, Bistatistique et Processus Spatiaux, Institut National de la Recherche Agronomique, Avignon, France. Correspondence and requests for materials should be addressed to D.B. (email: [daniele.bevacqua@inra.fr](mailto:daniele.bevacqua@inra.fr))

Title: Coupling epidemiological and tree growth models to control fungal diseases spread in fruit orchards.

Table 1: Management scenario (MS) characterized by crop load (CL (fruit tree<sup>-1</sup>)) and the value of stem water potential at midday, at the fruit growth period  $j$  (RDI <sub>$j$</sub> ). Estimated yield per plant in absence of disease (Y), and in presence of the disease, hence structured into susceptible (Y<sub>S</sub>), exposed (Y<sub>E</sub>) and infected fruit (Y<sub>I</sub>), average fruit fresh mass ( $m$ ) and sweetness ( $s$ ) at harvest, monetary value per unit of mass yield (MV). See the text for details on the computation of presented values.

| MS | CL  | RDI <sub>I</sub> | RDI <sub>II</sub> | RDI <sub>III</sub> | Y(kg) | Y <sub>S</sub> (kg) | Y <sub>E</sub> (kg) | Y <sub>I</sub> (kg) | $m$ (g) | $s$ (%) | MV   |
|----|-----|------------------|-------------------|--------------------|-------|---------------------|---------------------|---------------------|---------|---------|------|
| 1  | 53  | -0.7             | -0.7              | -0.7               | 11.03 | 10.87               | 0.01                | 0.05                | 208     | 5.9     | 0.25 |
| 2  | 157 | -0.7             | -0.7              | -0.7               | 30.91 | 18.46               | 2.95                | 6.26                | 197     | 5.7     | 0.22 |
| 3  | 471 | -0.7             | -0.7              | -0.7               | 74.91 | 0.91                | 2.22                | 31.21               | 159     | 4.8     | 0.10 |
| 4  | 53  | -0.7             | -1.4              | -0.7               | 10.82 | 10.73               | 0.01                | 0.03                | 204     | 5.9     | 0.25 |
| 5  | 157 | -0.7             | -1.4              | -0.7               | 30.35 | 26.64               | 1.10                | 1.79                | 193     | 5.7     | 0.22 |
| 6  | 471 | -0.7             | -1.4              | -0.7               | 73.08 | 3.71                | 10.77               | 38.83               | 155     | 4.8     | 0.10 |
| 7  | 53  | -0.7             | -2.2              | -0.7               | 10.59 | 10.52               | 0.01                | 0.02                | 200     | 5.8     | 0.25 |
| 8  | 157 | -0.7             | -2.2              | -0.7               | 29.68 | 27.28               | 0.73                | 1.13                | 190     | 5.7     | 0.21 |
| 9  | 471 | -0.7             | -2.2              | -0.7               | 71.10 | 6.94                | 15.97               | 34.95               | 151     | 4.8     | 0.10 |
| 10 | 53  | -0.7             | -0.7              | -1.4               | 6.93  | 6.85                | 0.01                | 0.02                | 131     | 9.0     | 0.72 |
| 11 | 157 | -0.7             | -0.7              | -1.4               | 18.97 | 14.82               | 1.33                | 1.75                | 121     | 8.9     | 0.64 |
| 12 | 471 | -0.7             | -0.7              | -1.4               | 42.48 | 2.01                | 5.58                | 17.67               | 90      | 8.3     | 0.30 |
| 13 | 53  | -0.7             | -0.7              | -2.2               | 4.66  | 4.61                | 0.01                | 0.01                | 86      | 12.3    | 0.35 |
| 14 | 157 | -0.7             | -0.7              | -2.2               | 12.91 | 10.41               | 0.88                | 0.92                | 82      | 12.5    | 0.29 |
| 15 | 471 | -0.7             | -0.7              | -2.2               | 29.56 | 23.89               | 3.34                | 1.41                | 63      | 11.8    | 0.14 |
| 16 | 53  | -0.7             | -1.4              | -1.4               | 6.81  | 6.77                | 0.00                | 0.01                | 128     | 9.0     | 0.71 |
| 17 | 157 | -0.7             | -1.4              | -1.4               | 18.68 | 18.08               | 0.20                | 0.23                | 119     | 8.9     | 0.62 |
| 18 | 471 | -0.7             | -1.4              | -1.4               | 41.54 | 35.17               | 3.90                | 1.91                | 88      | 8.4     | 0.29 |
| 19 | 53  | -0.7             | -1.4              | -2.2               | 4.55  | 4.53                | 0.00                | 0.00                | 86      | 12.3    | 0.33 |
| 20 | 157 | -0.7             | -1.4              | -2.2               | 12.64 | 12.54               | 0.03                | 0.03                | 81      | 12.5    | 0.28 |
| 21 | 471 | -0.7             | -1.4              | -2.2               | 28.15 | 28.03               | 0.04                | 0.00                | 60      | 12.1    | 0.12 |
| 22 | 53  | -0.7             | -2.2              | -1.4               | 6.63  | 6.59                | 0.00                | 0.01                | 125     | 9.0     | 0.68 |
| 23 | 157 | -0.7             | -2.2              | -1.4               | 18.18 | 17.77               | 0.14                | 0.15                | 116     | 8.8     | 0.59 |
| 24 | 471 | -0.7             | -2.2              | -1.4               | 40.27 | 36.49               | 2.34                | 1.09                | 86      | 8.4     | 0.26 |
| 25 | 53  | -0.7             | -2.2              | -2.2               | 4.46  | 4.44                | 0.00                | 0.00                | 84      | 12.5    | 0.31 |
| 26 | 157 | -0.7             | -2.2              | -2.2               | 12.25 | 12.17               | 0.02                | 0.02                | 78      | 12.5    | 0.25 |
| 27 | 471 | -0.7             | -2.2              | -2.2               | 27.26 | 27.14               | 0.04                | 0.00                | 58      | 12.1    | 0.11 |
| 28 | 53  | -1.4             | -0.7              | -0.7               | 10.97 | 10.84               | 0.01                | 0.04                | 207     | 5.9     | 0.25 |
| 29 | 157 | -1.4             | -0.7              | -0.7               | 30.76 | 22.87               | 2.14                | 3.91                | 196     | 5.7     | 0.22 |
| 30 | 471 | -1.4             | -0.7              | -0.7               | 74.42 | 1.37                | 3.89                | 35.44               | 158     | 4.8     | 0.10 |
| 31 | 53  | -1.4             | -1.4              | -0.7               | 10.77 | 10.68               | 0.01                | 0.02                | 203     | 5.9     | 0.25 |
| 32 | 157 | -1.4             | -1.4              | -0.7               | 30.24 | 26.96               | 0.98                | 1.58                | 193     | 5.7     | 0.22 |

|    |     |      |      |      |       |       |       |       |     |      |      |
|----|-----|------|------|------|-------|-------|-------|-------|-----|------|------|
| 33 | 471 | -1.4 | -1.4 | -0.7 | 72.63 | 4.44  | 12.30 | 38.18 | 154 | 4.8  | 0.10 |
| 34 | 53  | -1.4 | -1.4 | -1.4 | 6.76  | 6.73  | 0.00  | 0.01  | 128 | 9.0  | 0.70 |
| 35 | 157 | -1.4 | -1.4 | -1.4 | 18.60 | 18.07 | 0.18  | 0.20  | 118 | 8.9  | 0.62 |
| 36 | 471 | -1.4 | -1.4 | -1.4 | 41.25 | 35.04 | 3.81  | 1.86  | 88  | 8.4  | 0.28 |
| 37 | 53  | -1.4 | -1.4 | -2.2 | 4.52  | 4.50  | 0.00  | 0.00  | 85  | 12.3 | 0.33 |
| 38 | 157 | -1.4 | -1.4 | -2.2 | 12.58 | 12.49 | 0.03  | 0.02  | 80  | 12.5 | 0.27 |
| 39 | 471 | -1.4 | -1.4 | -2.2 | 27.94 | 27.82 | 0.04  | 0.00  | 59  | 12.1 | 0.12 |
| 40 | 53  | -1.4 | -2.2 | -0.7 | 10.52 | 10.45 | 0.01  | 0.02  | 199 | 5.8  | 0.24 |
| 41 | 157 | -1.4 | -2.2 | -0.7 | 29.55 | 27.20 | 0.71  | 1.11  | 188 | 5.6  | 0.21 |
| 42 | 471 | -1.4 | -2.2 | -0.7 | 70.80 | 7.07  | 16.10 | 34.60 | 150 | 4.8  | 0.10 |
| 43 | 53  | -1.4 | -2.2 | -1.4 | 6.58  | 6.54  | 0.00  | 0.01  | 124 | 9.0  | 0.67 |
| 44 | 157 | -1.4 | -2.2 | -1.4 | 18.07 | 17.68 | 0.13  | 0.15  | 115 | 8.8  | 0.58 |
| 45 | 471 | -1.4 | -2.2 | -1.4 | 39.98 | 36.28 | 2.29  | 1.06  | 84  | 8.3  | 0.26 |
| 46 | 53  | -1.4 | -2.2 | -2.2 | 4.45  | 4.44  | 0.00  | 0.00  | 84  | 12.6 | 0.31 |
| 47 | 157 | -1.4 | -2.2 | -2.2 | 12.17 | 12.09 | 0.02  | 0.02  | 77  | 12.5 | 0.25 |
| 48 | 471 | -1.4 | -2.2 | -2.2 | 27.04 | 26.92 | 0.04  | 0.00  | 57  | 12.1 | 0.11 |
| 49 | 53  | -1.4 | -0.7 | -1.4 | 6.89  | 6.86  | 0.00  | 0.00  | 130 | 9.0  | 0.72 |
| 50 | 157 | -1.4 | -0.7 | -1.4 | 18.90 | 16.99 | 0.66  | 0.79  | 120 | 8.9  | 0.63 |
| 51 | 471 | -1.4 | -0.7 | -1.4 | 42.19 | 25.52 | 9.54  | 5.57  | 89  | 8.4  | 0.30 |
| 52 | 53  | -1.4 | -0.7 | -2.2 | 4.63  | 4.61  | 0.00  | 0.00  | 87  | 12.3 | 0.35 |
| 53 | 157 | -1.4 | -0.7 | -2.2 | 12.84 | 12.47 | 0.13  | 0.12  | 82  | 12.5 | 0.29 |
| 54 | 471 | -1.4 | -0.7 | -2.2 | 28.81 | 28.68 | 0.04  | 0.00  | 61  | 12.1 | 0.13 |
